# Supplementary material for: Characterisation of the in vitro activity of a Nitazoxanide-N-methyl-1H-benzimidazole hybrid molecule against albendazole and nitazoxanide susceptible and resistant strains of Giardia intestinalis and its in vivo giardicidal activity
Source: PubMed Central journal article supplement (PMC7012584; doi:10.1590/0074-02760190348), 2020-02-07
Supplement: 1678-8060-mioc-115-e190348-s.pdf [file 1678-8060-mioc-115-e190348-s.pdf]

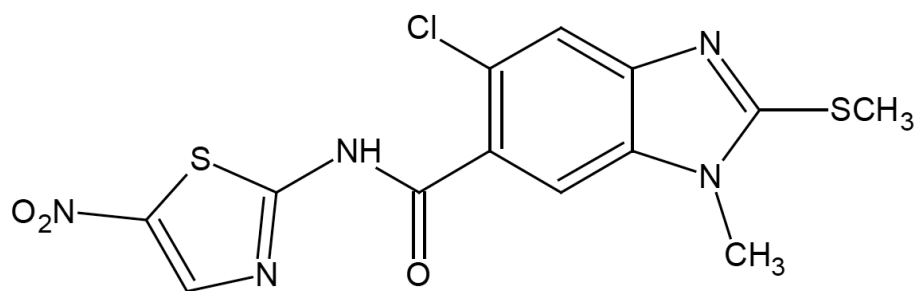

Compound **CMC-20**: 5-chloro-1-methyl-2-(methylsulfanyl)-*N*-(5-nitro-1,3-thiazol-2-yl)-1*H*-benzimidazole-6-carboxamide.
